# Supplementary material for: Extracellular Signalling Modulates Scar/WAVE Complex Activity through Abi Phosphorylation
Source: MDPI journal article supplement (doi:10.3390/cells10123485), 2021-12-10
Supplement: s1 [file s1]

# Supplementary Materials

|               |     |                                                                |     |
|---------------|-----|----------------------------------------------------------------|-----|
| Dictyostelium | 6   | DINVYSQTTPINAMAEI LMDNHNKMEQISAYCKSLYA-NGDAAQAYEQTQGYAKNALLNVA | 64  |
|               |     | ++ + + IP L D++ +E+++ YC++ Y + D +A E+T+ Y +L +VA              |     |
| H. sapiens    | 3   | ELQMLLEEEIPGRRALFDSYTNLERVADYCENNYIQSADKQRALEETKAYTTQSLASVA    | 62  |
| Dictyostelium | 65  | YHIQTVGTHITSLQLQTNEMEKLNIETLTQVRMIHDSTGTVNFSNQDAAPYKSSL        | 124 |
|               |     | Y I T+ ++ +L +Q +++ ++ I ++Q V + + K +S                        |     |
| H. sapiens    | 63  | YLINTLANNVLQMLDIQASQLRMESSINHISQTVDIHKEKVARREIGILTNNK—NTSR     | 120 |
| Dictyostelium | 125 | KNRKVDTEATKAPVKYVHKPISYGISASDINQNGVPPPLNHSNSSLANL              | 172 |
|               |     | ++ + + PV+Y+ KPI Y I DI +GV L S+ N+                            |     |
| H. sapiens    | 121 | THKIIAPANLERPVRYIRKPIDYTI-LDDIG-HGVKWLLEKVVSTQNM               | 166 |

**Figure S1.** Amino acid sequence comparison of *Dictyostelium* Abi with *Homo sapiens* Abi2. *Dictyostelium* Abi amino acid sequence was BLAST searched against *H. sapiens* which resulted in Abi2 as the nearest homolog with 24% identity and 49% similarity (E value=4-18). Conserved serine and threonine residue is indicated in red brackets.

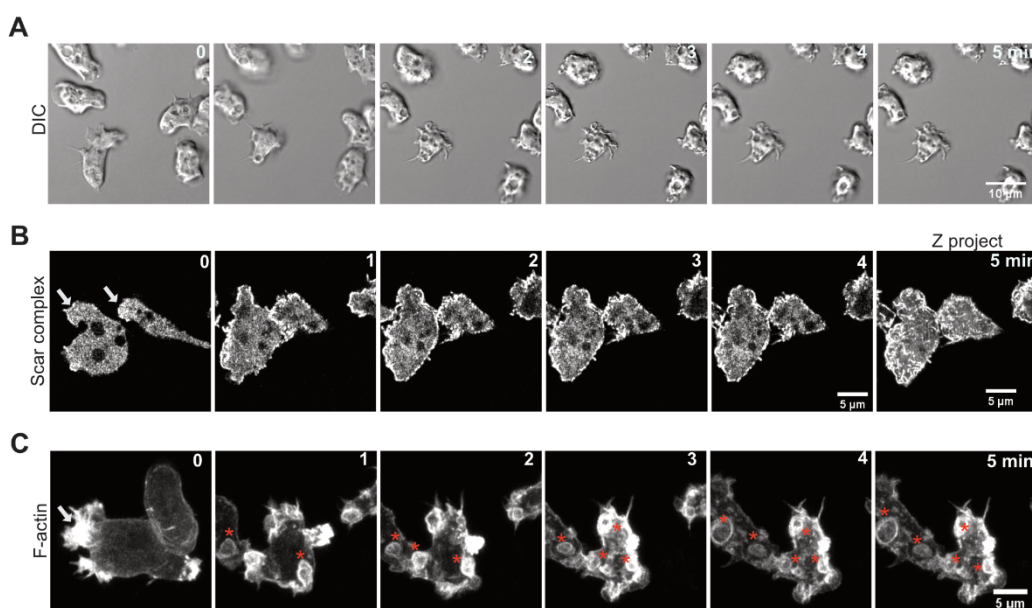

**Figure S2.** Effect of osmolarity on cell shape, Scar/WAVE and Actin localization. (A) Retraction of pseudopods and shrinkage of cells after addition of sorbitol (0.4 M). Cells in glass-bottom dishes were imaged by DIC microscopy at a frame interval of 2 s (Scale bar = 10 μm). (B) Distribution of the Scar/WAVE complex after sorbitol treatment. Cells expressing EGFP-Nap1, a marker of the Scar/WAVE complex, were imaged by AiryScan confocal microscopy, and 0.4 M sorbitol was added during imaging. Sorbitol inhibits localization of the Scar/WAVE complex from pseudopodia and causes relocation to the cell cortex (Scale bar = 5 μm). (C) Distribution of actin after sorbitol treatment. Cells expressing lifeact-mRFPmars2 were imaged by AiryScan confocal microscopy. Actin relocates to macropinosomes/vesicles (\*) after the addition of sorbitol (Scale bar = 5 μm).

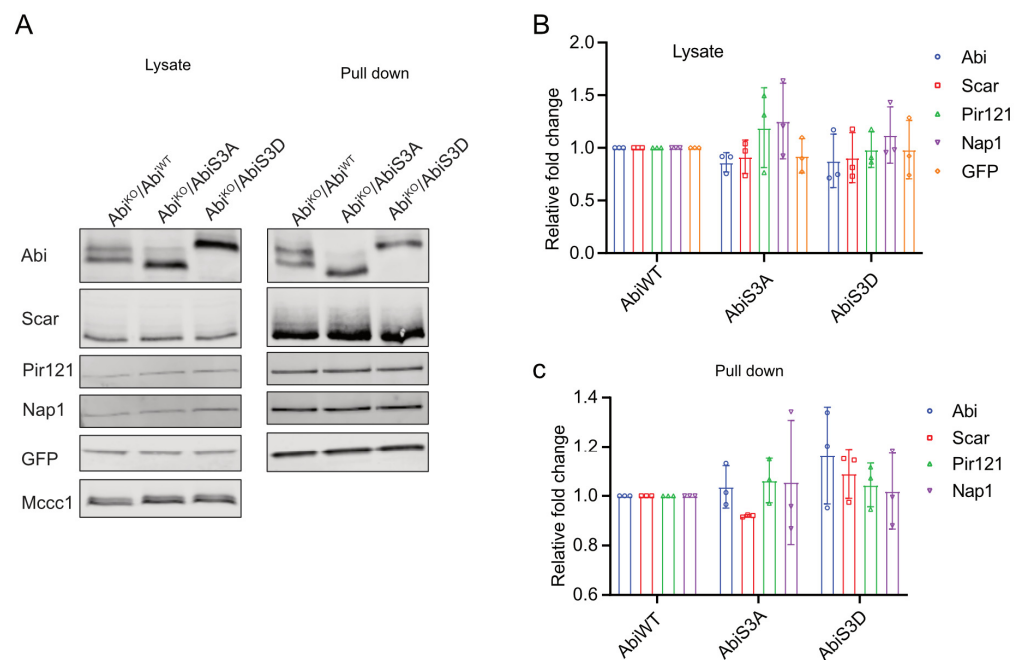

**Figure S3.** Expression pattern and effect of Abi<sup>WT</sup>, Abi<sup>S3A</sup> and Abi<sup>S3D</sup> in the Scar/WAVE complex formation. **(A)** Abi<sup>WT</sup>, Abi<sup>S3A</sup> and Abi<sup>S3D</sup> were co-expressed with HSPC300-eGFP in Abi<sup>-</sup> cells, and cell lysates were immunoprecipitated using GFP-TRAP. Lysate and pull-down samples were analyzed for the expression of Abi, Scar, Pir121, Nap1 and GFP by Western blotting. **(B,C)** Quantification of Western blots shows that Abi<sup>WT</sup>, Abi<sup>S3A</sup> and Abi<sup>S3D</sup> formed stable complexes.

**Video S1:** Recruitment of the Scar/WAVE complex after folate treatment. eGFP-Nap1 cells were seeded on Lab-Tek II coverglass chambers and imaged with an AiryScan microscope. Folate (200  $\mu$ M) was added to the cells undergoing imaging. Filmed at 1 frame/3 s, the movie shows 10 frames/second. Folate was added after frame 4 (after 12 s).

**Video S2:** Recruitment of the Scar/WAVE complex after cAMP treatment. eGFP-Nap1 cells were seeded on Lab-Tek II coverglass chambers and imaged by AiryScan confocal microscopy. cAMP (10  $\mu$ M) was added to the cells undergoing imaging. Filmed at 1 frame/3 s, the movie shows 10 frames/second. cAMP was added after frame 4 (after 12 s).

**Video S3:** Change in cell morphology after sorbitol treatment. *Dictyostelium* cells were seeded on Lab-Tek II coverglass chambers and imaged by DIC microscopy (60x). Filmed at 1 frame/1 s, the movie shows 10 frames/second.

**Video S4:** Recruitment of the Scar/WAVE complex after sorbitol treatment. eGFP-Nap1 cells were seeded on Lab-Tek II coverglass chambers and imaged by AiryScan confocal microscopy. Sorbitol (0.4 M) was added to the cells undergoing imaging. Filmed at 1 frame/3 s, the movie shows 10 frames/second.

**Video S5:** Recruitment of F-actin after sorbitol treatment. Life-act-eGFP expressing cells were seeded on Lab-Tek II coverglass chambers and imaged by AiryScan confocal microscopy. Sorbitol (0.4 M) was added to the cells undergoing imaging. Filmed at 1 frame/3 s, the movie shows 10 frames/second.

**Video S6:** Recruitment of the Scar/WAVE and Arp2/3 complexes after latrunculin treatment. eGFP-Nap1 cells expressing ArpC2-mRFPmars 2 were seeded on Lab-Tek II coverglass chambers and imaged by AiryScan confocal microscopy. LatrunculinA (5  $\mu$ M) was added to the cells undergoing imaging. Filmed at 1 frame/3 s, the movie shows 5 frames/second. Latrunculin was added after frame 1 (after 1 min).

**Video S7:** Scar complex activation in Abi phosphomutants. Abi<sup>KO</sup> cells co-expressing HSPC300-eGFP and Abi were allowed to migrate under agarose up folate gradient and Scar complex activation in pseudopods were observed by AiryScan confocal microscopy. Imaged at 1 frame/3 s, the movie shows 10 frames/second.

**Video S8:** Pseudopod formation in Abi phosphomutants. Abi<sup>KO</sup> cells expressing Abi<sup>WT</sup>, Abi<sup>S3A</sup> and Abi<sup>S3D</sup> were allowed to migrate under agarose up a folate gradient and observed by DIC microscopy. Filmed at 1 frame/2 s, the movie shows 10 frames/second.

**Video S9:** Scar complex activation in Abi phosphomutants. Scar-/Abi-/Pir121-eGFP cells expressing Scar<sup>WT</sup>/Abi<sup>WT</sup>, Scar<sup>S8A</sup>/Abi<sup>S3A</sup> and Scar<sup>S8D</sup>/Abi<sup>S3D</sup> were allowed to migrate under agarose up folate gradient and Scar complex activation in pseudopods were observed by AiryScan confocal microscopy. Imaged at 1 frame/3 s, the movie shows 10 frames/second.

**Video S10:** Pseudopod formation in Scar and Abi phosphomutants. Scar-/Abi- cells expressing Scar<sup>WT</sup>/Abi<sup>WT</sup>, Scar<sup>S8A</sup>/Abi<sup>S3A</sup> and Scar<sup>S8D</sup>/Abi<sup>S3D</sup> were allowed to migrate under agarose up a folate gradient and observed by DIC microscopy. Filmed at 1 frame/2 s, the movie shows 10 frames/second.

**Table S1.** Cell lines used in this study.

| No. | Cell line              | Given Name | Reference  |
|-----|------------------------|------------|------------|
| 1.  | Ax3                    |            | dictyBase  |
| 2.  | NC4                    |            | dictyBase  |
| 3.  | Abi-                   | Ap5b       | [1]        |
| 4.  | eGFP-Nap1              | -          | [2]        |
| 5.  | Scar-/Abi-             | SP2        | This study |
| 6.  | Scar-/Abi-/Pir121-eGFP | SP21       | This study |
| 7.  | Pir121-                | SP3        | [3]        |
| 8.  | Pir121-eGFP WT         | SP7        | [3]        |
| 9.  | Pir121-eGFP A site     | SP11       | [3]        |

**Table S2.** List of primers.

| Amplicon Name       | Forward Primer (5'-3')                                              | Reverse Primer (5'-3')                                        |
|---------------------|---------------------------------------------------------------------|---------------------------------------------------------------|
| Abi 5'UTR           | GAATTCGCCGCG-<br>GAGGGAATAATTTAGAGGA                                | GCATTTGGAATTGTGGTTT-<br>GTGAATAAACG                           |
| Abi S166, 168, 169A | GTTCCACCACCATT-<br>GAATCATGCAAATGCAG-<br>CAGCTAATTTAACATCATCA<br>AG | CTTGATGATGTTAAATT-<br>AGCTGCTGCATTTCATGAT-<br>TCAATGGTGGTGAAC |
| Abi S166, 168, 169D | GATAATGACGAC-<br>GCTAATTTAACATCATCAAG<br>TG                         | ATTAGCGTCGTCATTATCATG<br>ATTCAATGGTGGTGAAC                    |
| Pir121 3'UTR        | CAAAAAGATAAA-<br>GCTTATCGCCAC-<br>CACCCCCACCAATGTAA                 | TACGCAAACCGCCTCTGCCG-<br>GAATTCTTGA-<br>GAACTCCCTATCTTTATGATT |
| Blasticidin (BSR)   | GCAGAAGCCATT-<br>GCGATTGGT                                          | ACCAATCG-<br>CAATGGCTTCTGC                                    |
| Abi 5'UTR           | CCAATAGTAACAC-<br>TATCTGCCAT                                        |                                                               |
| Abi 3'UTR           |                                                                     | TATTAAAGGATGGTGG-<br>TATATTC                                  |

**Table S3.** Plasmids created and used in this study.

| No. | Name of the Plasmid | Gene/s                                     |
|-----|---------------------|--------------------------------------------|
| 1.  | pSP287              | Shuttle vector of Abi WT                   |
| 2.  | pSP318              | Pir121eGFP knock in vector                 |
| 3.  | pSP384              | Abi WT                                     |
| 4.  | pSP396              | Abi S166, 168, 169A (S3A)                  |
| 5.  | pSP427              | Abi S166, 168, 169D (S3D)                  |
| 6.  | pSP428              | Abi WT and HSPC300-eGFP                    |
| 7.  | pSP429              | Abi S166, 168, 169A (S3A) and HSPC300-eGFP |
| 8.  | pSP430              | Abi S166, 168, 169D (S3D) and HSPC300-eGFP |
| 9.  | pSP487              | ScarWT and AbiWT                           |
| 10. | pSP488              | ScarS8A and AbiS3A                         |
| 11. | pSP489              | ScarS8D and AbiS3D                         |

## References

1. Pollitt, A.Y.; Insall, R.H. Abi mutants in Dictyostelium reveal specific roles for the SCAR/WAVE complex in cytokinesis. *Curr Biol* **2008**, *18*, 203–210, doi:10.1016/j.cub.2008.01.026.
2. Ura, S.; Pollitt, A.Y.; Veltman, D.M.; Morrice, N.A.; Machesky, L.M.; Insall, R.H. Pseudopod growth and evolution during cell movement is controlled through SCAR/WAVE dephosphorylation. *Curr Biol* **2012**, *22*, 553–561, doi:10.1016/j.cub.2012.02.020.
3. Schaks, M.; Singh, S.P.; Kage, F.; Thomason, P.; Klünemann, T.; Steffen, A.; Blankenfeldt, W.; Stradal, T.E.; Insall, R.H.; Rottner, K. Distinct Interaction Sites of Rac GTPase with WAVE Regulatory Complex Have Non-redundant Functions in Vivo. *Current Biology* **2018**, *28*, 3674–3684. e3676.
